# Supplementary material for: Significant enhancement in the visible light photocatalytic properties of BiFeO3–graphene nanohybrids
Source: Royal Society of Chemistry journal article supplement (doi:10.1039/c2ta00141a), 2012-10-23
Supplement: c2ta00141a.pdf [file c2ta00141a.pdf]

## Significant Enhancement in The Visible Light Photocatalytic Properties of BiFeO<sub>3</sub>-Graphene Nanohybrids

Zhuoxuan Li<sup>1</sup>, Yang Shen<sup>1,\*</sup>, Cheng Yang<sup>2</sup>, Yuechuan Lei<sup>1</sup>, Yuhan Guan<sup>1</sup>, Yuanhua Lin<sup>1</sup>,

Dabo Liu<sup>2</sup> and Ce-Wen, Nan<sup>1,\*</sup>

<sup>1</sup> Department of Materials Science and Engineering, State Key Lab of New Ceramics  
and Fine Processing, Tsinghua University, Beijing, China, 100084

<sup>2</sup> Beijing Institute of Aeronautic Materials, Beijing, China, 100095

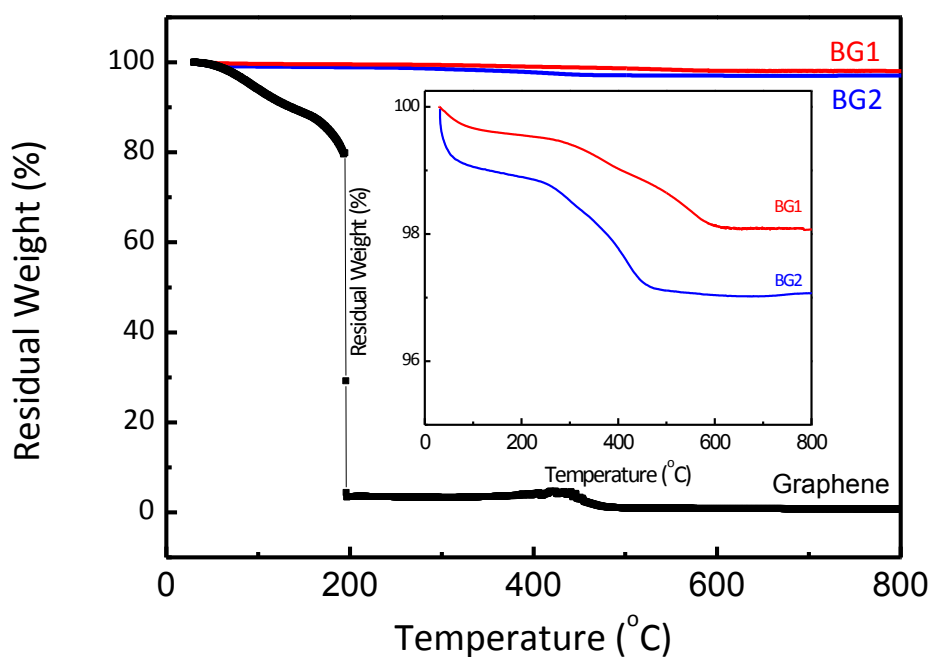

**Figure. 1S** Thermal Gravimetric Analysis (TGA) diagrams for graphene, BG1 and BG2. The weight loss of BG1 and BG2 is better distinguished in the inset.

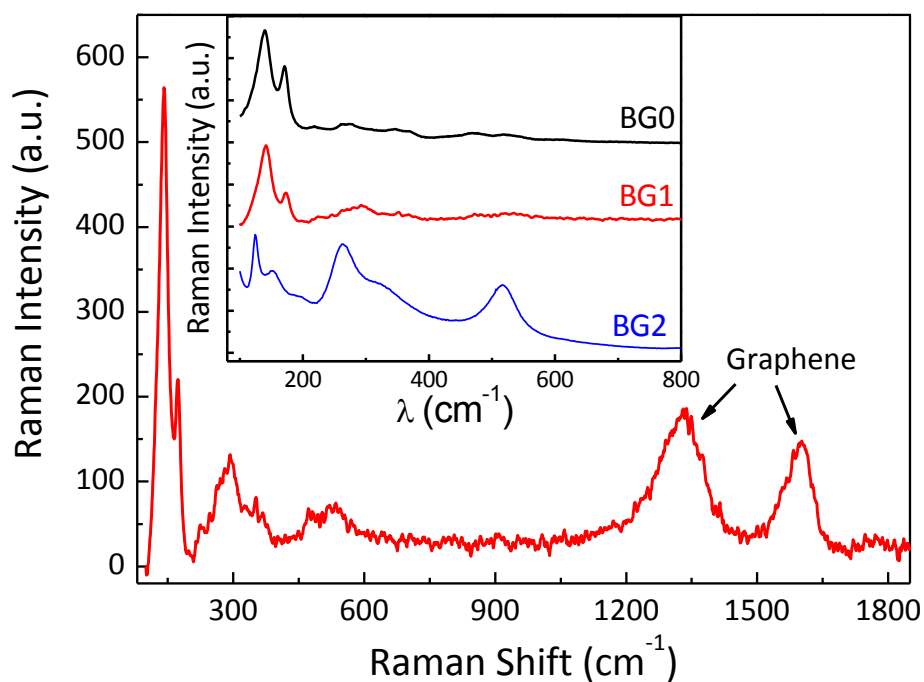

**Figure 2S** Raman spectra of BiFeO<sub>3</sub>-graphene nanohybrids. The bands from graphene are indicated by arrows. Superimposed in the inset are the comparisons between three samples for the Raman peaks of perovskite BiFeO<sub>3</sub> phase.

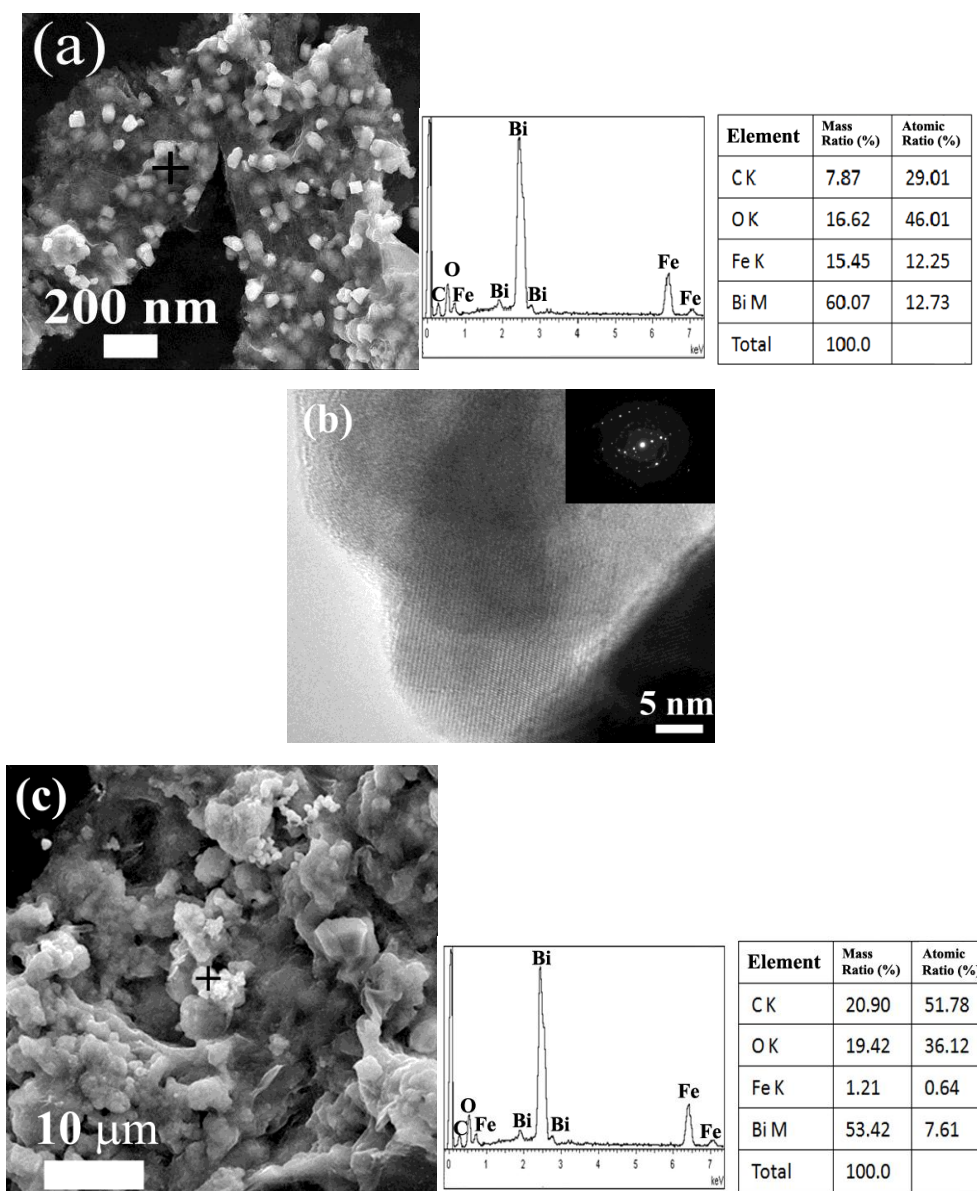

**Figure 3S** SEM images and results of EDAX analysis for (a) BiFeO<sub>3</sub>-graphene nanohybrids and (c) BG2. The sampling spots are indicated by cross in black. (b)HRTEM images and SAED patterns for BiFeO<sub>3</sub> nanocrystallines shown in (a).

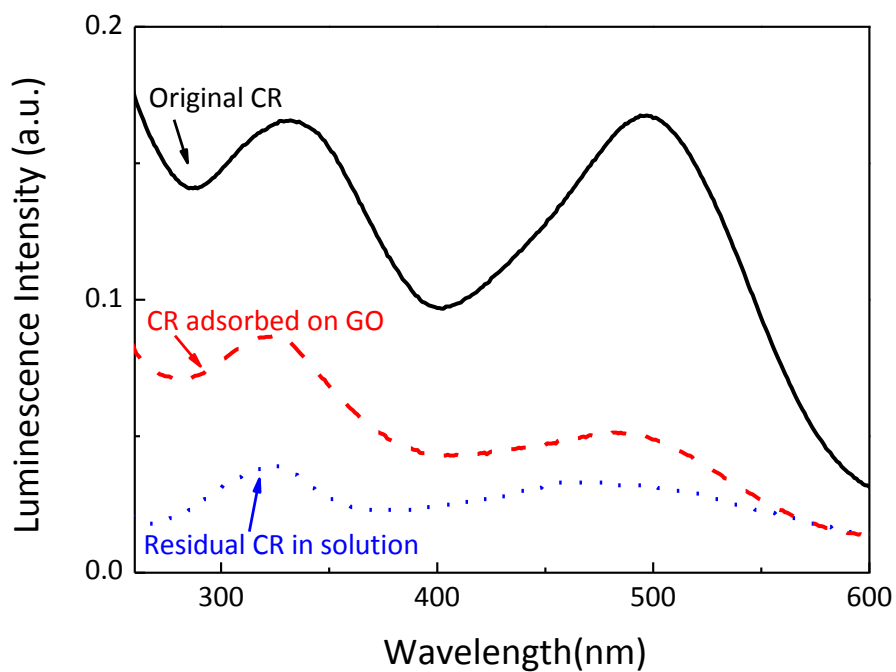

**Figure 4S** Photoluminescence spectra for CR in the original solution prior to the photocatalytic experiments (solid line in black), for the residual CR in the solution after being photocatalyzed for 120 mins (dot line in blue), and for CR adsorbed on the BiFeO<sub>3</sub>-graphene nanohybrids recovered after the photocatalytic experiments (dash line in red).
